# Supplementary material for: Comparison of surgical outcomes of robot-assisted laparoscopic partial nephrectomy performed by a single experienced surgeon according to two reconstruction methods, including single-layer and double-layer renorrhaphy
Source: Research Square preprint supplement (doi:10.21203/rs.3.rs-4623577/v1), 2024-07-18
Supplement: Supplementary file 1 [file 2694902f1dfbcbbff4744db4.docx]

| Table 1: Comparisons of patients’ characteristics according to suturing technique | | | | | | |  |  |
| --- | --- | --- | --- | --- | --- | --- | --- | --- |
|  |  | Pre-matching | |  |  | Post-matching | |  |
| Variables |  | Single-layer | Double-layer | p |  | Single-layer | Double-layer | p |
| Number of patients | | 59 | 495 |  |  | 58 | 58 |  |
| Sex, male, n |  | 39 (66%) | 364 (74%) | 0.2255 |  | 39 (67%) | 40 (69%) | 0.8421 |
| Age, yr, mean (±SD) | | 62 (12) | 59 (13) | 0.2029 |  | 61 (12) | 60 (13) | 0.6328 |
| BMI, kg/m2, mean (±SD) | | 24 (3.3) | 24 (3.8) | 0.5629 |  | 24 (3.2) | 24 (3.4) | 0.5941 |
| ASA score, n | 1 | 7 (12%) | 95 (19%) | 0.3045 |  | 7 (12%) | 10 (17%) | 0.7304 |
|  | 2 | 48 (81%) | 357 (72%) |  |  | 47 (81%) | 44 (76%) |  |
|  | 3 | 4 (7%) | 43 (9%) |  |  | 4 (7%) | 4 (6.9%) |  |
| Preope eGFR, ml/min/1.73m2 | | 63 (17) | 66 (16) | 0.3045 |  | 63 (17) | 62 (12) | 0.4013 |
| DM, n |  | 10 (17%) | 91 (18%) | 0.7873 |  | 10 (17%) | 10 (17%) | 1 |
| HTN, n |  | 29 (49%) | 229 (46%) | 0.674 |  | 29 (50%) | 24 (41%) | 0.3514 |
| Approach, n | Transperitoneal | 23 (39%) | 222 (45%) | 0.3912 |  | 23 (40%) | 20 (34%) | 0.5641 |
|  | Retroperitoneal | 36 (61%) | 273 (55%) |  |  | 35 (60%) | 38 (66%) |  |
| Tumor size, mm, mean, (±SD) | | 23 (11) | 33 (14) | <0.0001 |  | 23 (11) | 23 (11) | 0.8945 |
| NS, n | Low | 32 (54%) | 155 (31%) | 0.0012 |  | 31 (53%) | 32 (55%) | 0.8968 |
|  | Intermediate | 23 (39%) | 253 (51%) |  |  | 23 (40%) | 21 (36%) |  |
|  | High | 4 (7%) | 87 (18%) |  |  | 4 (7%) | 5 (9%) |  |
| SD: standard deviation, BMI: body mass index, ASA: American Society of Anesthesiologists, eGFR: estimated glomerular filtration rate, NS: nephrometory score, preope: preoperative | | | | | | | | |
