# Supplementary material for: Comparison of surgical outcomes of robot-assisted laparoscopic partial nephrectomy performed by a single experienced surgeon according to two reconstruction methods, including single-layer and double-layer renorrhaphy
Source: Research Square preprint supplement (doi:10.21203/rs.3.rs-4623577/v1), 2024-07-18
Supplement: Supplementary file 2 [file 89aabc693a46fc2333c2d8bb.docx]

| Table 2: Comparisons of surgical outcomes according to suturing technique | | | |  |  |  |  |  |
| --- | --- | --- | --- | --- | --- | --- | --- | --- |
|  |  | Pre-matching | | |  | Post-matching | | |
| Variables |  | Single-layer | Double-layer | p |  | Single-layer | Double-layer | p |
| Number of patients | | 59 | 495 |  |  | 58 | 58 |  |
| Operation time, min, mean (±SD) | | 91 (20) | 115 (32) | <0.001 |  | 91 (20) | 100 (22) | 0.0361 |
| Console time, min, mean (±SD) | | 58 (19) | 75 (26) | <0.001 |  | 58 (19) | 61 (18) | 0.2416 |
| Warm ischemia time, min, mean (±SD) | | 12 (6.0) | 18 (9.0) | <0.001 |  | 12 (6.0) | 14 (76.9) | 0.1713 |
| EBL, ml, mean (±SD) | | 7.7 (11) | 62 (137) | <0.001 |  | 7.9 (11) | 27 (54) | 0.021 |
| Perioperative transfusion, n | | 3 (5%) | 13 (3%) | 0.2865 |  | 2 (3.5%) | 0 (0%) | 0.1537 |
| Positive surgical margin, n | | 0 (0%) | 3 (0.6%) | 0.5488 |  | 0 (0%) | 0 (0%) |  |
| PLOS, days, mean (±SD) | | 3.2 (1.3) | 3.4 (1.2) | 0.0697 |  | 3.2 (1.3) | 3.4 (1.1) | 0.3255 |
| Complication, n | Overall | 2 (3.4%) | 37 (7.5%) | 0.245 |  | 2 (3.5%) | 2 (3.5%) | 1 |
|  | Grade 3 | 0 (0%) | 2 (0.4%) | 0.6248 |  | 0 (0%) | 0 (0%) | 1 |
| Resected volume, g, mean (±SD) | | 13 (18) | 28 (33) | <0.001 |  | 13 (18) | 10 (10) | 0.7113 |
| Preope eGFR, ml/min/1.73m2, mean (±SD) | | 63 (17) | 66 (16) | 0.3045 |  | 63 (17) | 62 (12) | 0.4013 |
| Postope eGFR, ml/min/1.73m2, mean (±SD) | | 62 (17) | 62 (16) | 0.805 |  | 62 (17) | 59 (12) | 0.2418 |
| Change in eGFR, %, mean (±SD) | | -1.1 (7.7) | -6.0 (9.2) | <0.001 |  | -1.2 (7.8) | -5.1 (10) | 0.0313 |
| SD: standard deviation, EBL: estimated blood loss, PLOS: postoperative length of hospital stay, eGFR: estimated glomerular filtration rate, Preope: preoperative, Postope: postoperative | | | | | | | | |
